# Supplementary material for: Phosphorization engineering ameliorated the electrocatalytic activity for overall water splitting on Ni3S2 nanosheets
Source: Royal Society of Chemistry journal article supplement (doi:10.1039/c9dt02841b), 2019-01-01
Supplement: c9dt02841b1.pdf [file c9dt02841b1.pdf]

## Supplementary Material

### **Phosphorization engineering ameliorated electrocatalytic activity for overall water splitting on Ni<sub>3</sub>S<sub>2</sub> nanosheets**

*Pengyan Wang,<sup>a</sup> Honglin He,<sup>b</sup> Zonghua Pu,<sup>a</sup> Lei Chen,<sup>a\*\*</sup> Chengtian Zhang,<sup>a</sup> Zhe Wang,<sup>a</sup>  
and Shichun Mu<sup>a\*</sup>*

<sup>a</sup> State Key Laboratory of Advanced Technology for Materials Synthesis and Processing,  
Wuhan University of Technology, Wuhan 430070, China

<sup>b</sup> Central Theater Command General Hospital of the Chinese People's Liberation Army,  
Wuhan 430070, China

\* Corresponding author

\*\* Corresponding author

E-mail: msc@whut.edu.cn (S. Mu), chl0588@163.com (L. Chen).

## **1. Experimental Section**

### **1.1. Chemicals.**

$\text{Ni}(\text{NO}_3)_2 \cdot 6\text{H}_2\text{O}$ , thiourea, KOH, hexamethylene tetramine (HMT) and  $\text{NaH}_2\text{PO}_2 \cdot \text{H}_2\text{O}$  were obtained from Aladdin Reagent Ltd. Acetone and absolute ethanol were acquired from Beijing Chemical Works Ltd. Nafion (5 wt %), Pt/C (20 wt %) and  $\text{IrO}_2$  were provided by Sigma-Aldrich. All the reagents in the experiments were analytical grade and used as received. High purity water supplied by the Millipore system was used as a solvent.

### **1.2. Preparation of $\text{Ni}_2\text{P}/\text{NF}$ .**

The  $\text{Ni}_2\text{P}/\text{NF}$  was synthesized through a hydrothermal route following by phosphorization. First, the NF was immersed into a 35 mL homogeneous solution containing 10 mmol HMT and 5 mmol  $\text{Ni}(\text{NO}_3)_2 \cdot 6\text{H}_2\text{O}$ . Next, the solution with NF was transferred into a 50 mL Teflon-lined stainless steel autoclave and treated at 100 °C for 10 h to obtain Ni precursor on NF. To obtain  $\text{Ni}_2\text{P}/\text{NF}$ , the Ni precursor and  $\text{NaH}_2\text{PO}_2 \cdot \text{H}_2\text{O}$  (the molar ratio of metal ion to phosphorus was 1 to 5) were put at the center and upstream side of the tube furnace, respectively. The sample was then annealed at 300 °C for 2 h under continuous  $\text{N}_2$  atmosphere. Subsequently, the tube furnace was cooled down naturally and obtained the black product  $\text{Ni}_2\text{P}/\text{NF}$ .

### **1.3. Preparation of $\text{Ni}_3\text{S}_2/\text{NF}$ .**

At first, a piece of Ni foam (NF) (2 cm × 3 cm) was carefully sonicated in acetone, absolute ethanol and deionized water for 5 min to remove the surface oxides. Afterwards, the weight of the pretreated NF was weighed and recorded. After that, the  $\text{Ni}_3\text{S}_2/\text{NF}$  electrode was prepared via a typical hydrothermal procedure: 6 mmol  $\text{Ni}(\text{NO}_3)_2 \cdot 6\text{H}_2\text{O}$  and 4 mmol thiourea were dissolved in deionized water by stirring about 30 min. Next, the cleaned NF was transferred into a 50 mL Teflon-lined stainless steel autoclave containing the above homogeneous

solution and treated at 120 °C for 6 h. After the system naturally cooled down to room temperature, the  $\text{Ni}_3\text{S}_2/\text{NF}$  was washed with ethanol and deionized water several times and then dried at 60 °C for 12 h under vacuum.

#### **1.4. Preparation of $\text{Ni}_3\text{S}_2\text{-Ni}_2\text{P}/\text{NF}$ .**

The  $\text{Ni}_2\text{P-Ni}_3\text{S}_2/\text{NF}$  was prepared by a partial phosphorization reaction between  $\text{Ni}_3\text{S}_2/\text{NF}$  and  $\text{NaH}_2\text{PO}_2\cdot\text{H}_2\text{O}$ . Briefly, the  $\text{Ni}_3\text{S}_2/\text{NF}$  and 2 g of  $\text{NaH}_2\text{PO}_2\cdot\text{H}_2\text{O}$  were placed at the centre and upstream of a tube furnace. After flushed with high purity  $\text{N}_2$ , the furnace was heated to 270 °C and maintained at this temperature for 30 min. Continuous  $\text{N}_2$  flow was maintained throughout the heating process and the subsequent natural cooling. For comparative studies, two additional samples were prepared under the same synthetic procedures except that the quality of  $\text{NaH}_2\text{PO}_2\cdot\text{H}_2\text{O}$  was changed to 1 g and 4 g. The mass loading of electrocatalysts on NF was about 6 mg  $\text{cm}^{-2}$ .

#### **1.5. Material Characterization.**

The morphology and structure were characterized by the field emission scanning electron microscopy (FE-SEM Zeiss Ultra Plus) and transmission electron microscopy (TEM JEM2100F). Power X-ray diffraction (XRD) patterns were collected on a Bruker D8 Advance. Inductively Coupled Plasma-Optical Emission Spectr (ICP-OES) analysis was performed on Prodigy 7. X-ray photoelectron spectroscopy (XPS) measurements were carried out on an ESCALABMK II X-ray photoelectron spectrometer.

#### **1.6. Electrochemical Measurements.**

All electrochemical measurements were performed on a CHI 660E electrochemical workstation (CHI Instruments, Shanghai, China) in a standard three-electrode system. The as-prepared catalysts on NF were directly utilized as working electrode. A Hg/HgO and graphite rod were used as the reference and the counter electrodes, respectively. The dispersed  $\text{IrO}_2$  or

Pt/C ink was obtained by ultrasonication of the mixture of 6 mg of IrO<sub>2</sub> or Pt/C, 500  $\mu$ L of ethanol, 500  $\mu$ L of water and 50  $\mu$ L of 5 wt % Nafion. Then, the catalyst ink was coated on NF (loading: 6 mg cm<sup>-2</sup>). All linear sweep voltammetry (LSV) curves were conducted in 1 M KOH at 25 °C with a scan rate of 5 mV s<sup>-1</sup> unless specifically stated. In HER and OER measurements, the Hg/HgO reference electrode was calibrated with respect to RHE by adding a value of 0.924 V. The obtained polarization curves for HER and OER were iR-corrected, where R is the solution resistance (2.2  $\Omega$  in 1 M KOH). Electrochemical impedance spectroscopy (EIS) analysis was carried out in the frequency range of 0.1 Hz to 100 kHz. The double layer capacitance (C<sub>dl</sub>) was determined by cyclic voltammetry (CV) curves at various scan rates of 20, 40, 60, 80, 100, 120, and 140 mV s<sup>-1</sup> in -0.51 ~ -0.57 V versus Hg/HgO region.

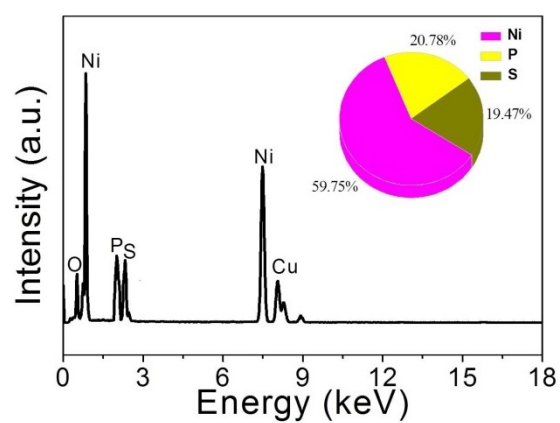

**Figure S1.** EDX spectrum of  $\text{Ni}_3\text{S}_2\text{-Ni}_2\text{P/NF}$  (inset: pie pattern of element distribution)

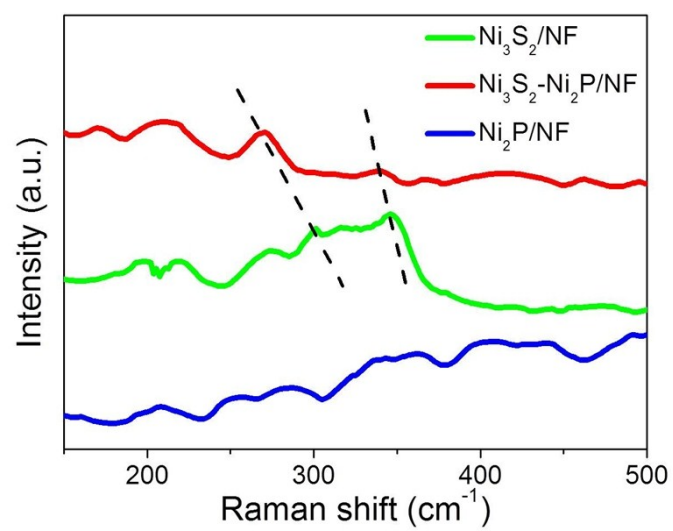

**Figure S2.** Raman spectra of  $\text{Ni}_2\text{P/NF}$ ,  $\text{Ni}_3\text{S}_2/\text{NF}$  and  $\text{Ni}_3\text{S}_2\text{-Ni}_2\text{P/NF}$ .

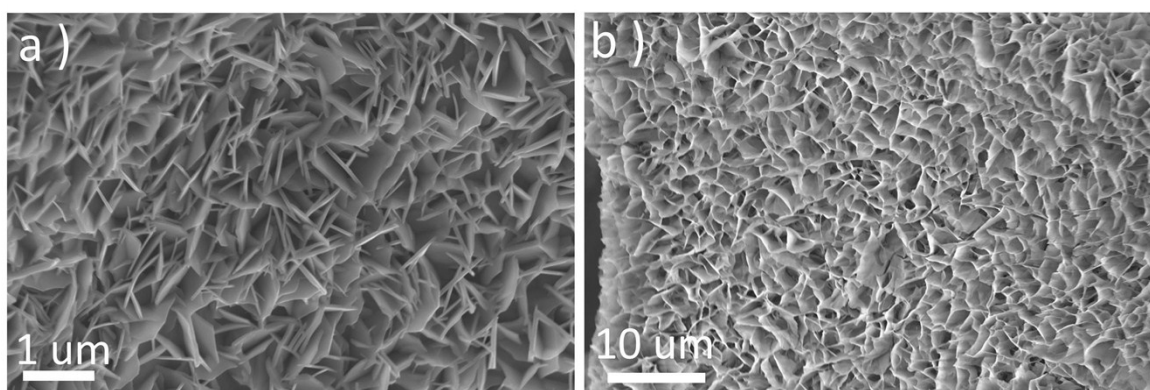

**Figure S3.** (a) SEM image of  $\text{Ni}_3\text{S}_2/\text{NF}$ . (b) SEM image of  $\text{Ni}_2\text{P}/\text{NF}$ .

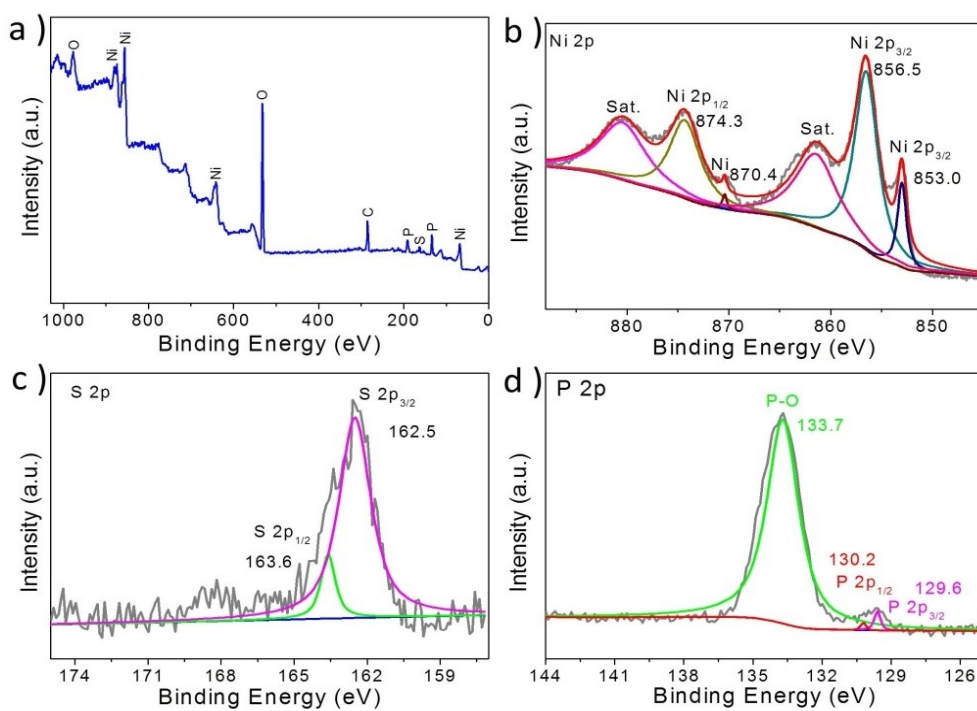

**Figure S4.** (a) XPS survey spectrum for  $\text{Ni}_3\text{S}_2\text{-Ni}_2\text{P/NF}$ . Core level (b) Ni 2p, (c) S 2p and (d)

P 2p XPS spectra collected for  $\text{Ni}_3\text{S}_2\text{-Ni}_2\text{P/NF}$ .

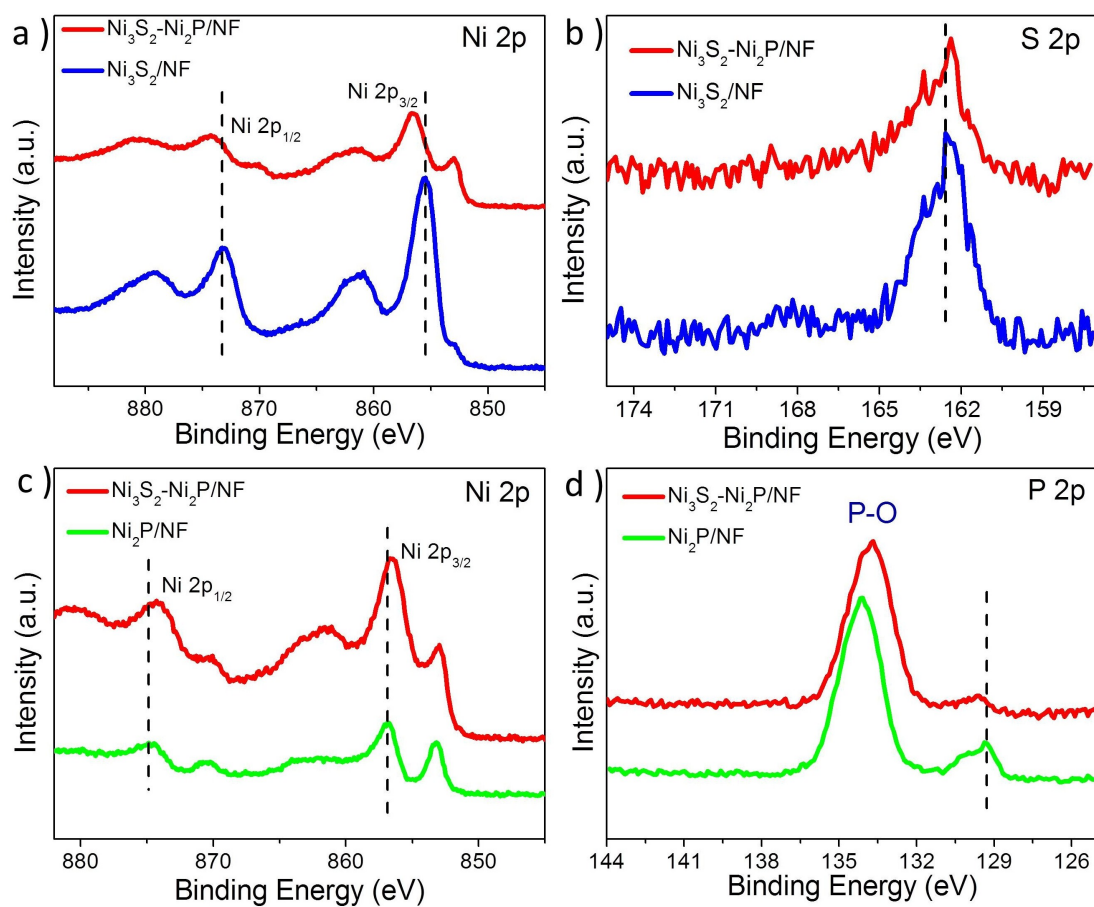

**Figure S5.** (a) Ni 2p and (b) S 2p XPS spectra of Ni<sub>3</sub>S<sub>2</sub>/NF and Ni<sub>3</sub>S<sub>2</sub>-Ni<sub>2</sub>P/NF. (c) Ni 2p and (d) P 2p XPS spectra of Ni<sub>2</sub>P/NF and Ni<sub>3</sub>S<sub>2</sub>-Ni<sub>2</sub>P/NF.

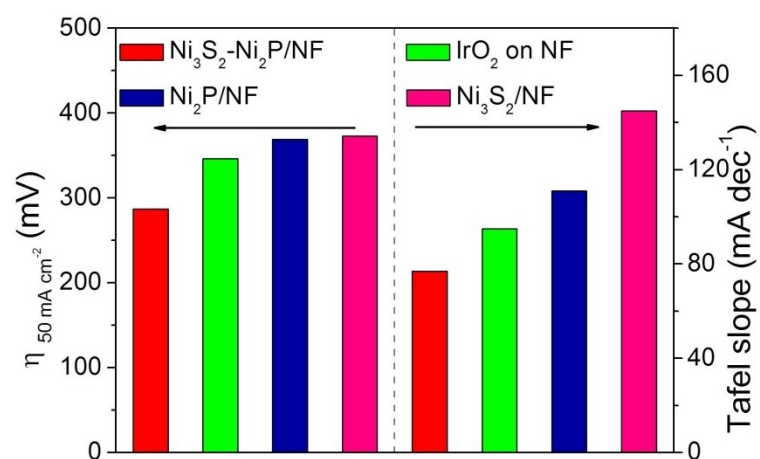

**Figure S6.** Overpotentials at  $j = 50 \text{ mA cm}^{-2}$  (left) and Tafel slopes (right) for IrO<sub>2</sub> on NF, Ni<sub>2</sub>P/NF, Ni<sub>3</sub>S<sub>2</sub>/NF and Ni<sub>3</sub>S<sub>2</sub>-Ni<sub>2</sub>P/NF in 1 M KOH

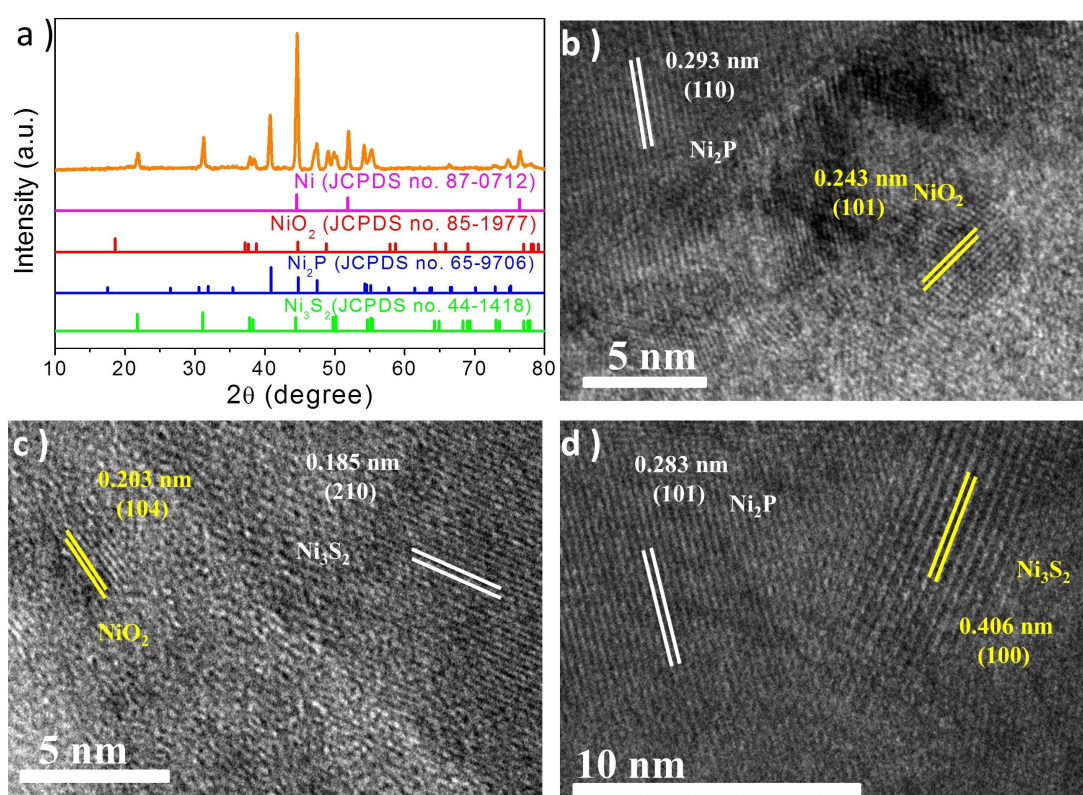

**Figure S7.** (a) XRD pattern and (b-d) HRTEM images of  $\text{Ni}_3\text{S}_2\text{-Ni}_2\text{P/NF}$  after OER test.

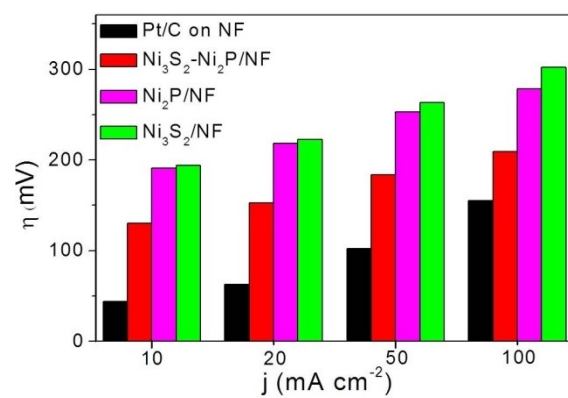

**Figure S8.** Overpotentials at at  $j = 10, 20, 50$  and  $100 \text{ mA cm}^{-2}$  of Pt/C on NF, Ni<sub>2</sub>P/NF, Ni<sub>3</sub>S<sub>2</sub>/NF and Ni<sub>3</sub>S<sub>2</sub>-Ni<sub>2</sub>P/NF.

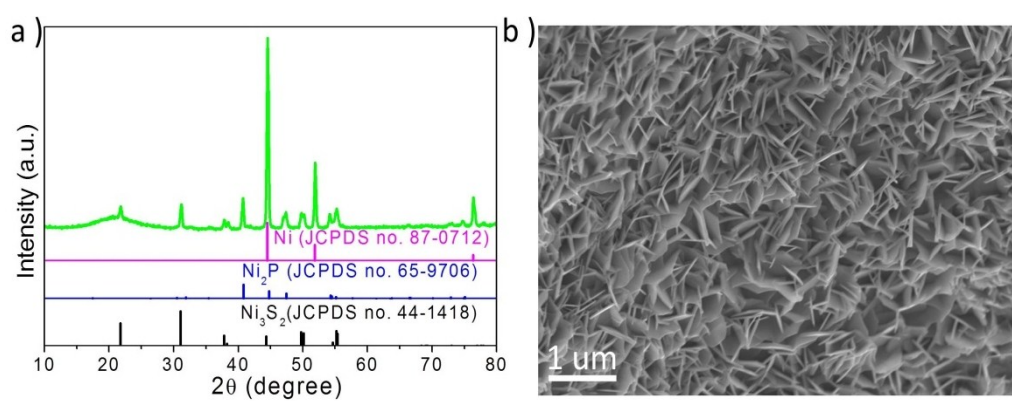

**Figure S9.** XRD pattern (a) and SEM image (b) of  $\text{Ni}_3\text{S}_2\text{-Ni}_2\text{P/NF}$  after long-term HER stability test.

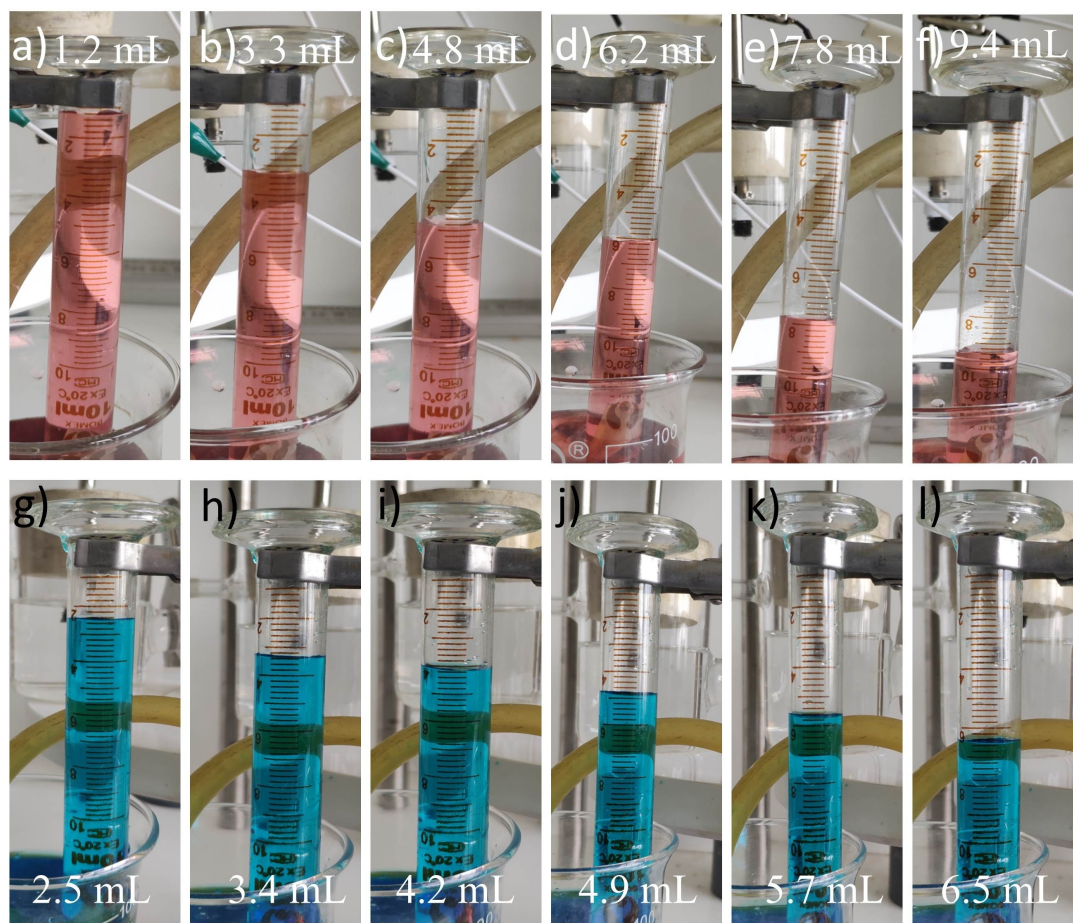

**Figure S10.** (a, b, c, d, e, f) Corresponding levels of hydrogen gas generated at 0s, 200s, 400s, 600s, 800s, 1000s. (g, h, i, j, k, l) Corresponding levels of oxygen gas generated at 0s, 200s, 400s, 600s, 800s, 1000s.

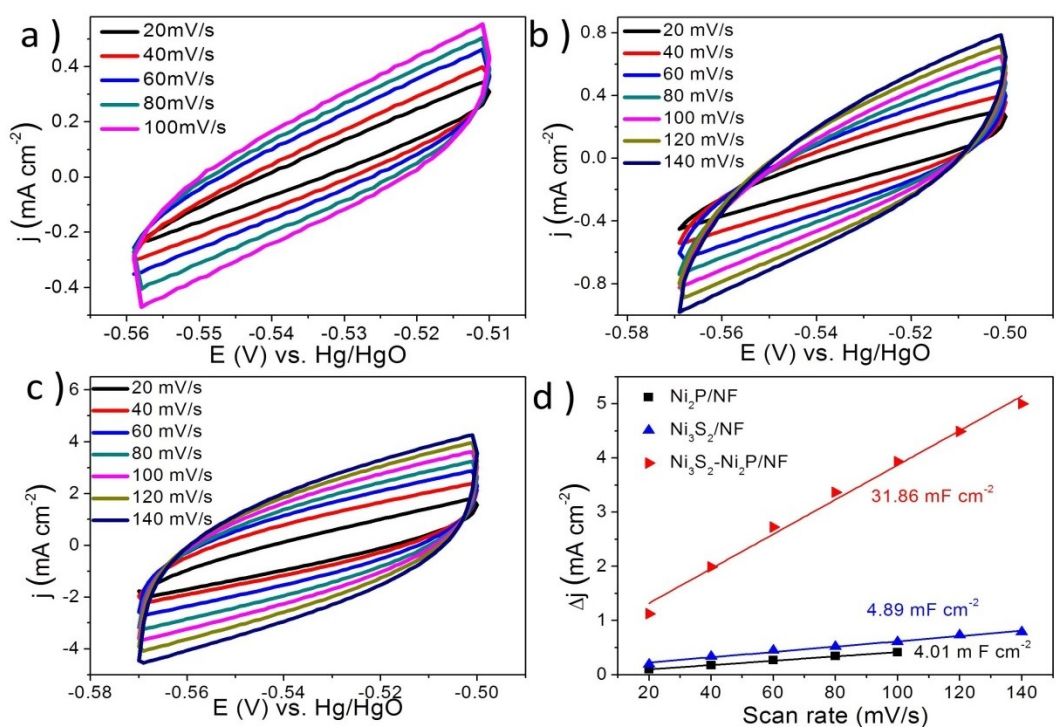

**Figure S11.** Cyclic voltammogram (CV) curves at different scan rates for (a)  $\text{Ni}_2\text{P}/\text{NF}$ , (b)  $\text{Ni}_3\text{S}_2/\text{NF}$  and (c)  $\text{Ni}_3\text{S}_2\text{-Ni}_2\text{P}/\text{NF}$ . The current density variation at 0.535 V versus  $\text{Hg}/\text{HgO}$  plotted against with the scan rates (d).

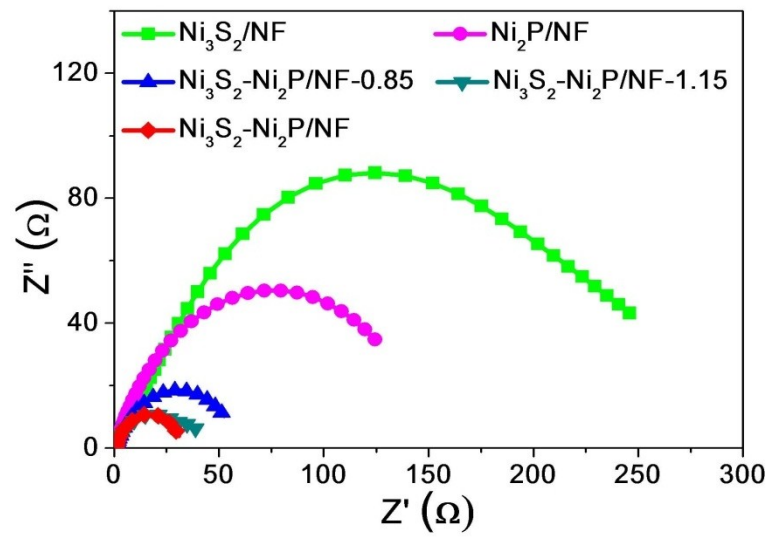

**Figure S12.** Nyquist plots of  $\text{Ni}_2\text{P}/\text{NF}$ ,  $\text{Ni}_3\text{S}_2/\text{NF}$ ,  $\text{Ni}_3\text{S}_2\text{-Ni}_2\text{P}/\text{NF}$ ,  $\text{Ni}_3\text{S}_2\text{-Ni}_2\text{P}/\text{NF-1.15}$  and  $\text{Ni}_3\text{S}_2\text{-Ni}_2\text{P}/\text{NF-0.85}$  recorded in 1 M KOH.

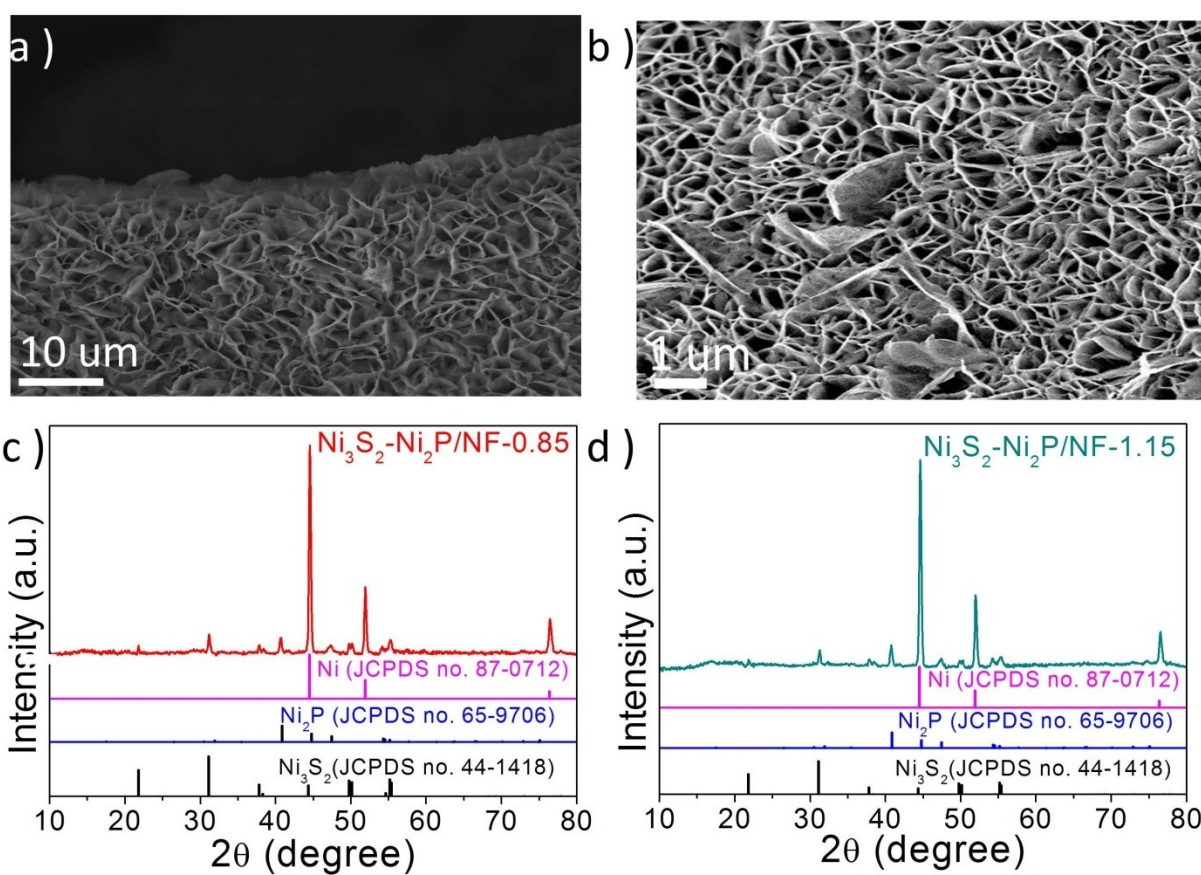

**Figure S13.** (a) SEM image and (c) XRD pattern of Ni<sub>3</sub>S<sub>2</sub>-Ni<sub>2</sub>P/NF-0.85. (b) SEM image and (d) XRD pattern of Ni<sub>3</sub>S<sub>2</sub>-Ni<sub>2</sub>P/NF-1.15.

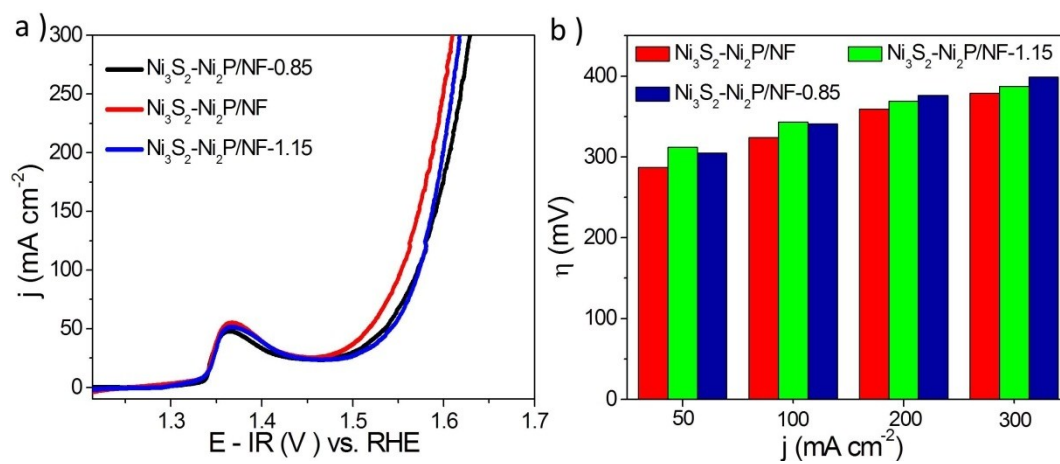

**Figure S14.** (a) Polarization curves and (b) overpotentials at  $j = 50, 100, 200$  and  $300 \text{ mA cm}^{-2}$  of a series of  $\text{Ni}_3\text{S}_2\text{-Ni}_2\text{P/NF}$  with different P/S molar ratios for OER in 1 M KOH.

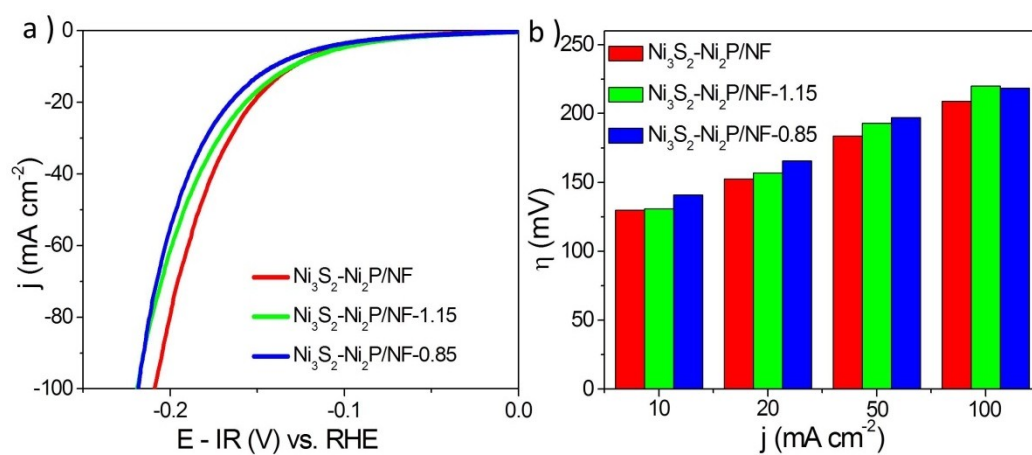

**Figure S15.** (a) Polarization curves and (b) overpotentials at  $j = 10, 20, 50$  and  $100 \text{ mA cm}^{-2}$  of a series of  $\text{Ni}_3\text{S}_2\text{-Ni}_2\text{P/NF}$  with different P/S molar ratios in 1 M KOH.

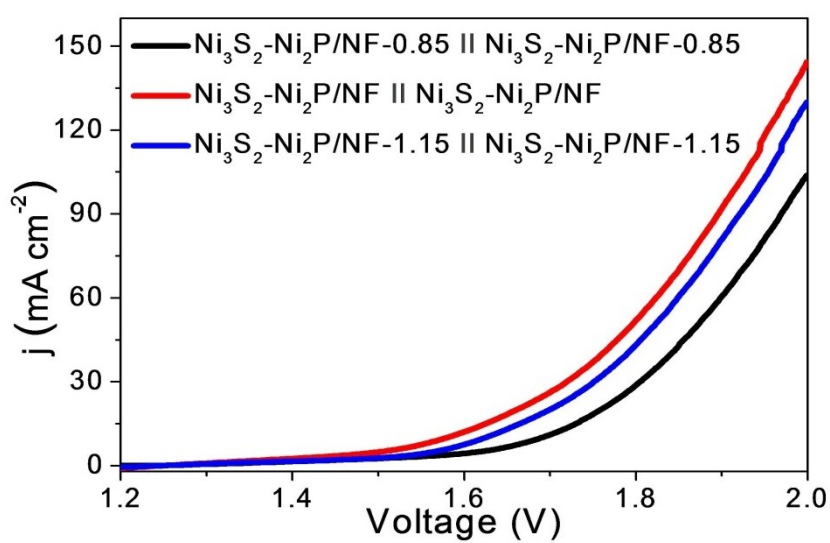

**Figure S16.** Polarization curves of a series of  $\text{Ni}_3\text{S}_2\text{-Ni}_2\text{P/NF}$  ||  $\text{Ni}_3\text{S}_2\text{-Ni}_2\text{P/NF}$  electrolytic cells with different P/S molar ratios toward overall water splitting in 1 M KOH at a scan rate of 5  $\text{mV s}^{-1}$ .

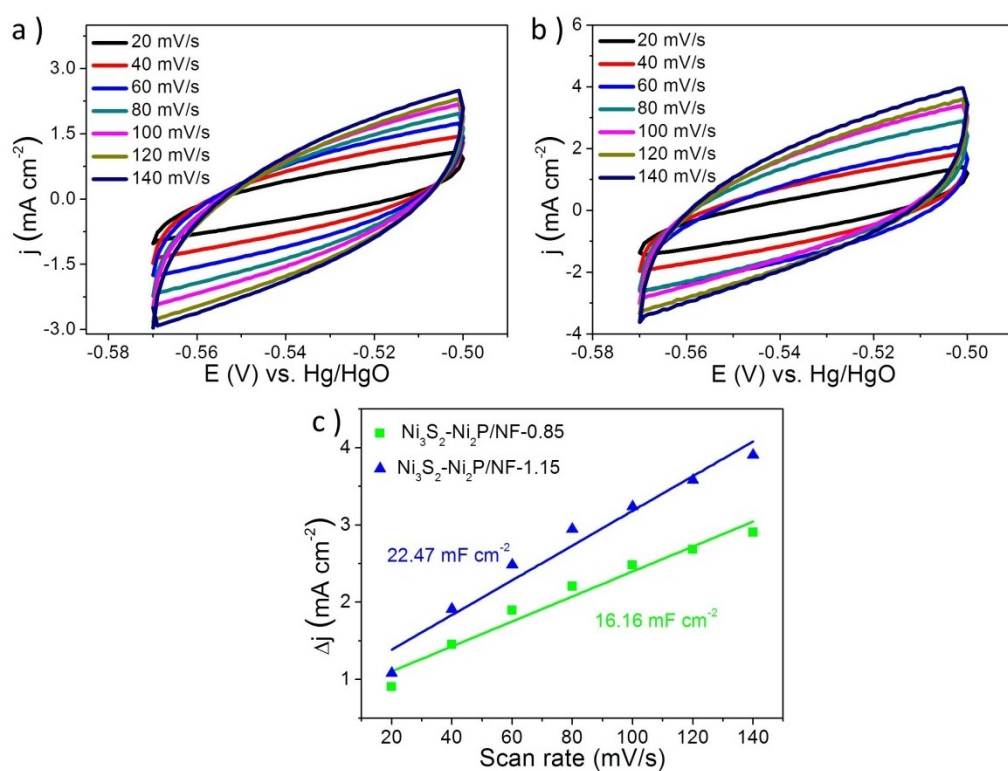

**Figure S17.** Cyclic voltammogram (CV) curves at different scan rates for (a)  $\text{Ni}_3\text{S}_2\text{-Ni}_2\text{P/NF-0.85}$  and (b)  $\text{Ni}_3\text{S}_2\text{-Ni}_2\text{P/NF-1.15}$ . (c) The current density variation at 0.535 V versus Hg/HgO plotted against with the scan rates.

**Table S1.** ICP-OES analysis data for the molar ratios of P and S elements in the as-prepared  $\text{Ni}_2\text{P-Ni}_3\text{S}_2/\text{NF}$  catalysts.

| Sample                                                            | $\text{Ni}_3\text{S}_2\text{-Ni}_2\text{P/NF-0.85}$ | $\text{Ni}_3\text{S}_2\text{-Ni}_2\text{P/NF}$ | $\text{Ni}_3\text{S}_2\text{-Ni}_2\text{P/NF-1.15}$ |
|-------------------------------------------------------------------|-----------------------------------------------------|------------------------------------------------|-----------------------------------------------------|
| Quality of $\text{NaH}_2\text{PO}_2 \cdot \text{H}_2\text{O}$ (g) | 1g                                                  | 2g                                             | 4g                                                  |
| Mass percentage of S (%)                                          | 14.63                                               | 12.91                                          | 12.69                                               |
| Mass percentage of P (%)                                          | 11.97                                               | 13.29                                          | 14.11                                               |
| Molar ratio of P/S                                                | 0.85                                                | 1.07                                           | 1.15                                                |

**Table S2.** Comparison of OER performance for Ni<sub>3</sub>S<sub>2</sub>-Ni<sub>2</sub>P/NF with other reported OER electrocatalysts.

| Catalysts                                                             | Overpotential@j<br>(mV@mA cm <sup>-2</sup> ) | Electrolytes | Ref.      |
|-----------------------------------------------------------------------|----------------------------------------------|--------------|-----------|
| Ni <sub>3</sub> S <sub>2</sub> -Ni <sub>2</sub> P/NF                  | 287@50                                       | 1 M KOH      | This work |
| Ni <sub>0.75</sub> V <sub>0.25</sub> -LDH                             | 350@10                                       | 1M KOH       | 1         |
| NiO <sub>x</sub> /NiOOH                                               | 320@10                                       | 1 M NaOH     | 2         |
| NiFe LDHs                                                             | 305@10                                       | 1 M KOH      | 3         |
| Ni <sub>45</sub> Fe <sub>55</sub> oxyhydroxide                        | 310@10                                       | 0.1 M KOH    | 4         |
| CoCr LDH                                                              | 340@10                                       | 1 M NaOH     | 5         |
| NiO                                                                   | 347@20                                       | 1 M KOH      | 6         |
| Ni <sub>3</sub> N/NF                                                  | 399@20                                       | 1 M KOH      | 7         |
| Ni <sub>2</sub> P nanoparticles                                       | 290@10                                       | 1M KOH       | 8         |
| Co <sub>4</sub> N/CC                                                  | 257@10                                       | 1 M KOH      | 9         |
| Ni-Co-P HNBS                                                          | 270@10                                       | 1 M KOH      | 10        |
| Na <sub>0.08</sub> Ni <sub>0.9</sub> Fe <sub>0.1</sub> O <sub>2</sub> | 260@10                                       | 1 M KOH      | 11        |
| MoS <sub>2</sub> -Ni <sub>3</sub> S <sub>2</sub> HNRs/NF              | 249@10                                       | 1 M KOH      | 12        |
| 3D-Co/ cobaltphytate<br>nanoplates                                    | 265@10                                       | 1 M KOH      | 13        |
| FeNi-rGO LDH                                                          | 206@10                                       | 1 M KOH      | 14        |

**Table S3.** Comparison of HER performance in 1 M KOH for Ni<sub>3</sub>S<sub>2</sub>-Ni<sub>2</sub>P/NF with other reported HER electrocatalysts.

| Catalysts                                                | Overpotential (mV) at<br>10 mA cm <sup>-2</sup> | Tafel slope<br>(mV dec <sup>-1</sup> ) | Ref.      |
|----------------------------------------------------------|-------------------------------------------------|----------------------------------------|-----------|
| Ni <sub>3</sub> S <sub>2</sub> -Ni <sub>2</sub> P/NF     | 130                                             | 77.6                                   | This work |
| CoP/CC                                                   | 209                                             | 129                                    | 15        |
| WP/CC                                                    | 150                                             | 102                                    | 16        |
| MoP <sub>2</sub> /Mo                                     | 194                                             | 80                                     | 17        |
| Ni <sub>3</sub> S <sub>2</sub> /NF                       | 223                                             | -                                      | 18        |
| Ni/NC                                                    | 219                                             | 101                                    | 19        |
| Ni/Mo <sub>2</sub> C-PC                                  | 179                                             | 101                                    | 20        |
| CoS <sub>2</sub>                                         | 244                                             | 133                                    | 21        |
| WN/CC                                                    | 285                                             | 170                                    | 22        |
| MoS <sub>2</sub> -Ni <sub>3</sub> S <sub>2</sub> HNRs/NF | 98                                              | 61                                     | 12        |
| Co-Mo/Ti                                                 | 75                                              | ---                                    | 23        |
| Fe-CoP/Ti                                                | 78                                              | 75                                     | 24        |
| C-MoS <sub>2</sub>                                       | 45                                              | 46                                     | 25        |
| MoS <sub>2</sub> @Ni/CC                                  | 91                                              | 89                                     | 26        |
| WS <sub>2(1-x)</sub> Se <sub>2x</sub> /NiSe <sub>2</sub> | 88                                              | 47                                     | 27        |
| MoP <sub>2</sub> NS/CC                                   | 67                                              | 70                                     | 28        |

**Table S4.** Comparison of overall water splitting performance for the electrolyzer assembled by two Ni<sub>3</sub>S<sub>2</sub>-Ni<sub>2</sub>P/NF electrodes with other reported alkaline electrolyzer assembled by bifunctional catalysts.

| Catalysts                                            | Voltage (V) @10 mA<br>cm <sup>-2</sup> | Electrolytes | Ref.      |
|------------------------------------------------------|----------------------------------------|--------------|-----------|
| Ni <sub>3</sub> S <sub>2</sub> -Ni <sub>2</sub> P/NF | 1.58                                   | 1 M KOH      | This work |
| NiS/Ni foam                                          | 1.64                                   | 1 M KOH      | 29        |
| NiCo <sub>2</sub> S <sub>4</sub> NA/CC               | 1.68                                   | 1 M KOH      | 30        |
| Ni <sub>3</sub> S <sub>2</sub> /NF                   | 1.76                                   | 1 M KOH      | 18        |
| Ni-P foam                                            | 1.64                                   | 1 M KOH      | 31        |
| FeNi <sub>3</sub> N/NF                               | 1.62                                   | 1 M KOH      | 32        |
| Ni <sub>2</sub> P                                    | 1.63                                   | 1 M KOH      | 8         |
| CoSe/Ti                                              | 1.65                                   | 1 M KOH      | 33        |
| Ni <sub>5</sub> P <sub>4</sub>                       | 1.69                                   | 1 M KOH      | 34        |
| Ni <sub>3</sub> Se <sub>2</sub> /NF                  | 1.61                                   | 1 M KOH      | 35        |

## References

- 1 K. Fan, H. Chen, Y. Ji, H. Huang, P. M. Claesson, Q. Daniel, B. Philippe, H. Rensmo, F. Li, Y. Luo and L. Sun, *Nat. Commun.*, 2016, **7**, 11981.
- 2 D. A. Kuznetsov, D. V. Konev, N. y. S. Komarova, A. M. Ionov, R. N. Mozhchil and I. V. Fedyanin, *Chem. Commun.*, 2016, **52**, 9255-9258.
- 3 F. Song and X. Hu, *Nat. Commun.*, 2014, **5**, 4477.
- 4 M. Görlin, P. Chernev, J. Ferreira de Araújo, T. Reier, S. Dresp, B. Paul, R. Krähnert, H. Dau and P. Strasser, *J. Am. Chem. Soc.*, 2016, **138**, 5603-5614.
- 5 C. Dong, X. Yuan, X. Wang, X. Liu, W. Dong, R. Wang, Y. Duan and F. Huang, *J. Mater. Chem. A*, 2016, **4**, 11292-11298.
- 6 L. A. Stern and X. Hu, *Faraday Discuss.*, 2014, **176**, 363-379.
- 7 M. Shalom, D. Ressnig, X. Yang, G. Clavel, T. P. Feller and M. Antonietti, *J. Mater. Chem. A*, 2015, **3**, 8171-8177.
- 8 L.-A. Stern, L. Feng, F. Song and X. Hu, *Energy Environ. Sci.*, 2015, **8**, 2347-2351.
- 9 P. Chen, K. Xu, Z. Fang, Y. Tong, J. Wu, X. Lu, X. Peng, H. Ding, C. Wu and Y. Xie, *Angew. Chem. Int. Ed.*, 2015, **54**, 14710-14714.
- 10 E. Hu, Y. Feng, J. Nai, D. Zhao, Y. Hu and X. W. Lou, *Energy Environ. Sci.*, 2018, **11**, 872-880.
- 11 B. Weng, F. Xu, C. Wang, W. Meng, C. R. Grice and Y. Yan, *Energy Environ. Sci.*, 2017, **10**, 121-128.
- 12 Y. Yang, K. Zhang, H. Lin, X. Li, H. C. Chan, L. Yang and Q. Gao, *ACS Catal.*, 2017, **7**, 2357-2366.
- 13 P. Li, Z. Jin, J. Yang, Y. Jin and D. Xiao, *Chem. Mater.*, 2015, **28**, 153-161.
- 14 X. Long, J. Li, S. Xiao, K. Yan, Z. Wang, H. Chen and S. Yang, *Angew. Chem. Int. Ed.*, 2014, **53**, 7584-7588.
- 15 J. Tian, Q. Liu, A. M. Asiri and X. Sun, *J. Am. Chem. Soc.*, 2014, **136**, 7587-7590.

- 16 Z. Pu, Q. Liu, A. M. Asiri and X. Sun, *ACS Appl. Mater. Interfaces*, 2014, **6**, 21874-21879.
- 17 Z. Pu, I. S. Amiinu, X. Liu, M. Wang and S. Mu, *Nanoscale*, 2016, **8**, 17256-17261.
- 18 L. L. Feng, G. Yu, Y. Wu, G. D. Li, H. Li, Y. Sun, T. Asefa, W. Chen and X. Zou, *J. Am. Chem. Soc.*, 2015, **137**, 14023-14026.
- 19 X. Zhang, H. Xu, X. Li, Y. Li, T. Yang and Y. Liang, *ACS Catal.*, 2015, **6**, 580-588.
- 20 Z. Y. Yu, Y. Duan, M. R. Gao, C. C. Lang, Y. R. Zheng and S. H. Yu, *Chem. Sci.*, 2017, **8**, 968-973.
- 21 H. Zhang, Y. Li, G. Zhang, P. Wan, T. Xu, X. Wu and X. Sun, *Electrochim. Acta*, 2014, **148**, 170-174.
- 22 J. Shi, Z. Pu, Q. Liu, A. M. Asiri, J. Hu and X. Sun, *Electrochim. Acta*, 2015, **154**, 345-351.
- 23 J. M. McEnaney, T. L. Soucy, J. M. Hodges, J. F. Callejas, J. S. Mondschein and R. E. Schaak, *J. Mater. Chem. A*, 2016, **4**, 3077-3081.
- 24 C. Tang, R. Zhang, W. Lu, L. He, X. Jiang, A. M. Asiri and X. Sun, *Adv. Mater.*, 2017, **29**, 1602441.
- 25 Y. Zang, S. Niu, Y. Wu, X. Zheng, J. Cai, J. Ye, Y. Xie, Y. Liu, J. Zhou, J. Zhu, X. Liu, G. Wang and Y. Qian, *Nat. Commun.*, 2019, **10**, 1217.
- 26 Z. Xing, X. Yang, A. M. Asiri and X. Sun, *ACS Appl. Mater. Interfaces*, 2016, **8**, 14521-14526.
- 27 H. Zhou, F. Yu, J. Sun, H. Zhu, I. K. Mishra, S. Chen and Z. Ren, *Nano lett.*, 2016, **16**, 7604-7609.
- 28 W. Zhu, C. Tang, D. Liu, J. Wang, A. M. Asiri and X. Sun, *J. Mater. Chem. A*, 2016, **4**, 7169-7173.
- 29 W. Zhu, X. Yue, W. Zhang, S. Yu, Y. Zhang, J. Wang and J. Wang, *Chem. Commun.*, 2016, **52**, 1486-1489.

- 30 D. Liu, Q. Lu, Y. Luo, X. Sun and A. M. Asiri, *Nanoscale*, 2015, **7**, 15122-15126.
- 31 X. Wang, W. Li, D. Xiong and L. Liu, *J. Mater. Chem. A*, 2016, **4**, 5639-5646.
- 32 B. Zhang, C. Xiao, S. Xie, J. Liang, X. Chen and Y. Tang, *Chem. Mater.*, 2016, **28**, 6934-6941.
- 33 T. Liu, Q. Liu, A. M. Asiri, Y. Luo and X. Sun, *Chem. Commun.*, 2015, **51**, 16683-16686.
- 34 M. Ledendecker, S. Krick Calderon, C. Papp, H. P. Steinruck, M. Antonietti and M. Shalom, *Angew. Chem. Int. Ed.*, 2015, **54**, 12361-12365.
- 35 R. Xu, R. Wu, Y. Shi, J. Zhang and B. Zhang, *Nano Energy*, 2016, **24**, 103-110.
